# Supplementary material for: Hyaluronic Acid and a Short Peptide Improve the Performance of a PCL Electrospun Fibrous Scaffold Designed for Bone Tissue Engineering Applications
Source: MDPI journal article supplement (doi:10.3390/ijms22052425), 2021-03-12
Supplement: s1 [file s1]

## Supplementary Materials

# Hyaluronic Acid and a Short Peptide Improve the Performance of a PCL Electrospun Fibrous Scaffold Designed for Bone Tissue Engineering Applications

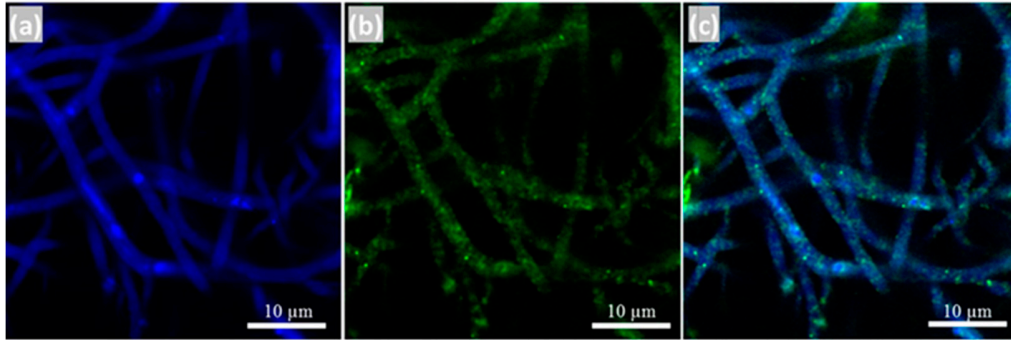

**Figure S1.** Confocal micrograph of the HA/PCL core/shell fibers scaffold. (a) The PCL component, (b) the HA component, and (c) The overlay of the two components.

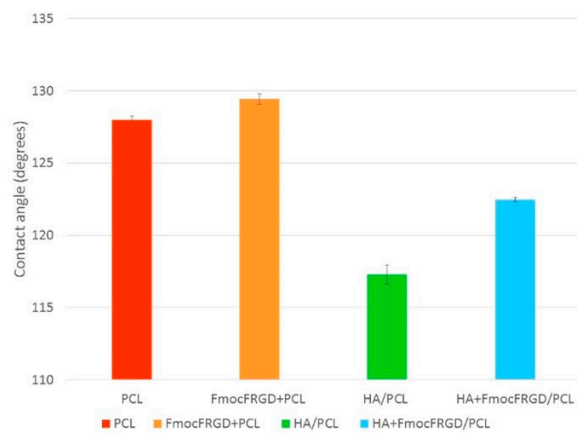

**Figure S2.** Water contact angle measurements of PCL, FmocFRGD+PCL, HA/PCL core/shell and HA+FmocFRGD/PCL core/shell scaffolds before plasma treatment.

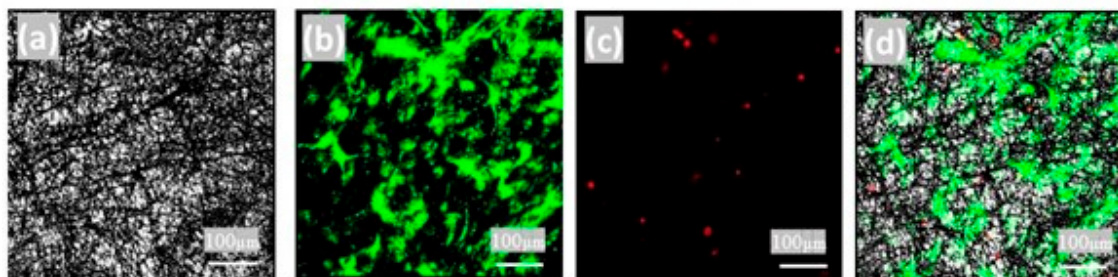

**Figure S3.** Live/Dead assay of MC3T3-E1 cells on FmocFRGD+PCL fibers. MC3T3-E1 cells cultured for 3 days and stained with fluorescein diacetate and propidium iodine. (a) brightfield image, (b) fluorescein diacetate stain, (c) propidium iodine stain, (d) merged image.

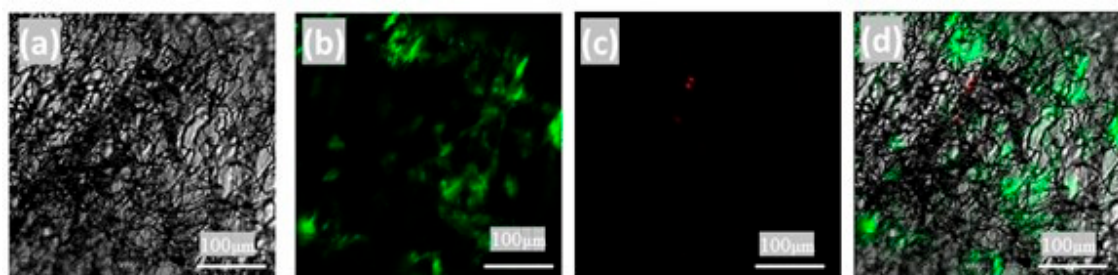

**Figure S4.** Live/Dead assay of MC3T3-E1 cells on HA/PCL core/shell fibers. MC3T3-E1 cells cultured for 3 days and stained with fluorescein diacetate and propidium iodine. (a) brightfield image, (b) fluorescein diacetate stain, (c) propidium iodine stain, (d) merged image.

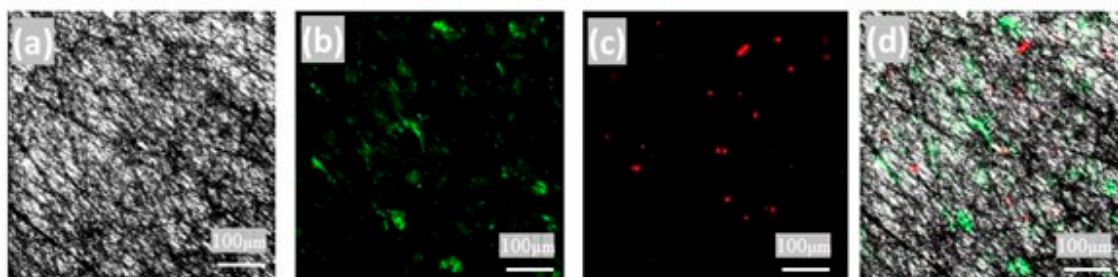

**Figure S5.** Live/Dead assay of MC3T3-E1 cells on PCL fibers. MC3T3-E1 cells cultured for 3 days and stained with fluorescein diacetate and propidium iodine. (a) brightfield image, (b) fluorescein diacetate stain, (c) propidium iodine stain, (d) merged image.
